# Supplementary material for: Proteomic Profiling of Fallopian Tube-Derived Extracellular Vesicles Using a Microfluidic Tissue-on-Chip System
Source: MDPI journal article supplement (doi:10.3390/bioengineering10040423), 2023-03-27
Supplement: s1 [file s1]

## Supplementary Information

# Proteomic Profiling of Fallopian Tube-Derived Extracellular Vesicles Using a Microfluidic Tissue-on-Chip System

Didi Zha <sup>1,†</sup>, Sagar Rayamajhi <sup>2,†</sup>, Jared Sipes <sup>2,†</sup>, Angela Russo <sup>1</sup>, Harsh B. Pathak <sup>2</sup>, Kailiang Li <sup>1</sup>, Mihaela E. Sardi <sup>3,4</sup>, Leonidas E. Bantis <sup>3</sup>, Amrita Mitra <sup>2</sup>, Rajni V. Puri <sup>2</sup>, Camille V. Trinidad <sup>2</sup>, Brian P. Cain <sup>5</sup>, Brett C. Isenberg <sup>5</sup>, Jonathan Coppeta <sup>5</sup>, Shannon MacLaughlan <sup>6</sup>, Andrew K. Godwin <sup>2,4,\*</sup> and Joanna E. Burdette <sup>1,\*</sup>

<sup>1</sup> Department of Pharmaceutical Sciences, College of Pharmacy, University of Illinois at Chicago, Chicago, IL 60607, USA

<sup>2</sup> Department of Pathology and Laboratory Medicine, University of Kansas Medical Center, Kansas City, KS 66160, USA

<sup>3</sup> Department of Biostatistics and Data Science, University of Kansas Medical Center, Kansas City, KS 66160, USA

<sup>4</sup> Kansas Institute for Precision Medicine, University of Kansas Medical Center, Kansas City, KS 66160, USA

<sup>5</sup> Charles Stark Draper Laboratory, Cambridge, MA 02139, USA

<sup>6</sup> Department of Obstetrics and Gynecology, College of Medicine, University of Illinois at Chicago, Chicago, IL 60607, USA

\* Correspondence: agodwin@kumc.edu (A.K.G.); joannab@uic.edu (J.E.B.)

† These authors contributed equally to this work.

### Table of Contents:

|                    |   |
|--------------------|---|
| 1. Figure S1 ..... | 2 |
| 2. Figure S2 ..... | 3 |
| 3. Table S1 .....  | 3 |
| 4. Table S2 .....  | 4 |
| 5. Table S3 .....  | 4 |

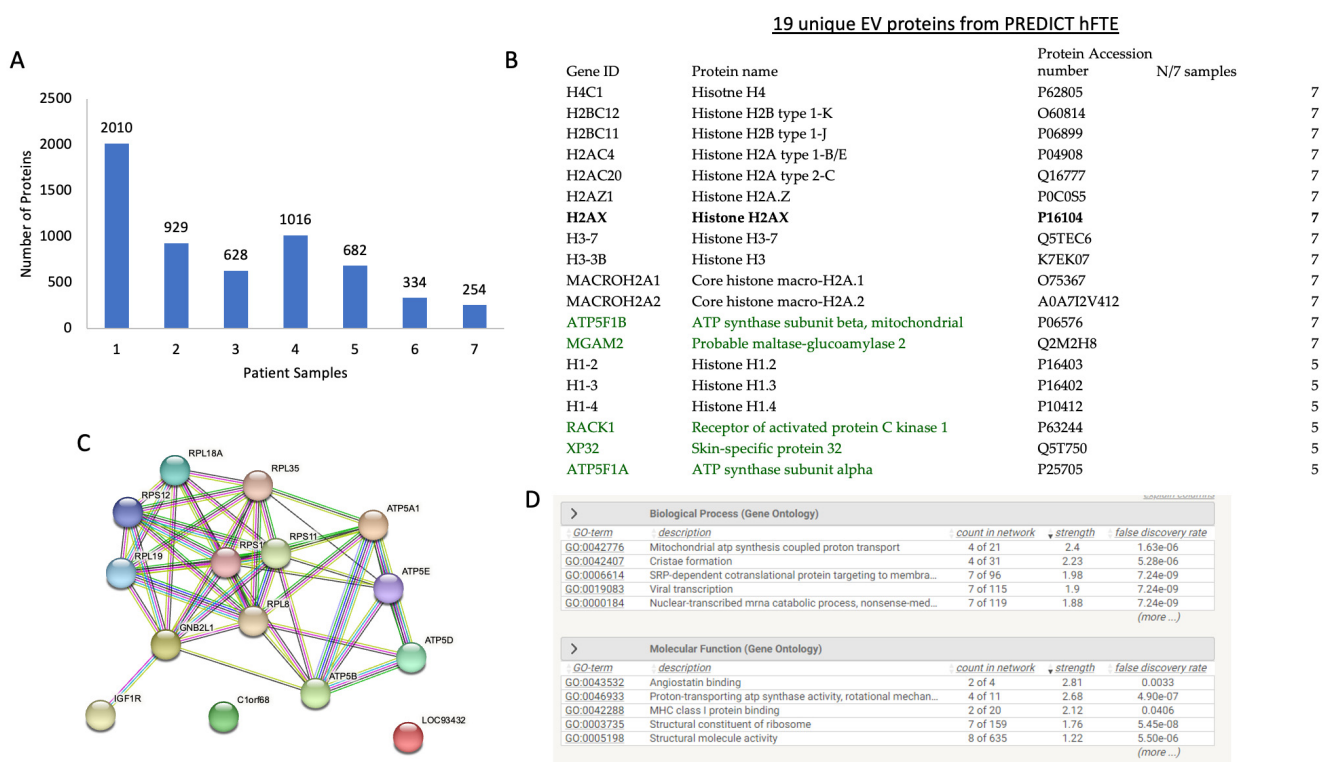

**Figure S1.** Proteomic profile of hFTE sEVs. (A) Number of protein identified in EVs derived from hFTE tissue explants from 7 different patients. (B) List of 19 unique EV proteins identified exclusively from our study. (C) Protein-protein interaction of 19 unique proteins. (D) Gene enrichment analysis showing biological process and molecular function associated with 19 unique proteins.

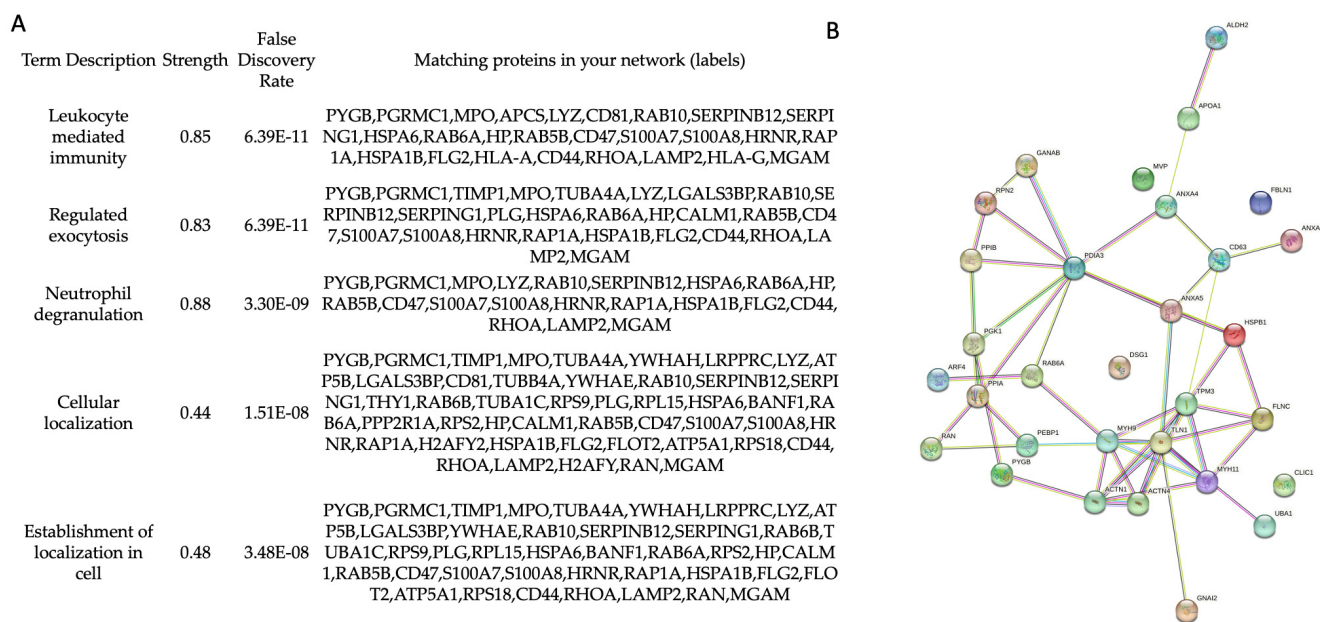

**Figure S2.** Pathway and protein interaction analysis of sEV proteins exclusively detected in human or serous tubal intraepithelial carcinoma (STIC). (A) Go term analysis of 119 human unique EV proteins. (B) Protein-protein interaction networks of 32 sEV proteins exclusively detected in STIC.

| Category  | CA#       | Age | Reason for surgery | Uterine diagnosis                           | FT Dx  |
|-----------|-----------|-----|--------------------|---------------------------------------------|--------|
| Sample 01 | 461_27257 | 65  | Endometrial Cancer | Adenosarcoma                                | Benign |
| Sample 02 | 461_27262 | 57  | Endometrial Cancer | Endometrial adenocarcinoma                  | Benign |
| Sample 03 | 461_27266 | 47  | EIN                | Endometrial intraepithelial neoplasia (EIN) | Benign |
| Sample 04 | 461_27268 | 63  | Endometrial Cancer | Endometrial adenocarcinoma                  | Benign |
| Sample 05 | 461_27273 | 60  | Endometrial Cancer | Endometrial adenocarcinoma                  | Benign |
| Sample 06 | 461_27277 | 64  | Endometrial Cancer | Endometrial adenocarcinoma                  | Benign |
| Sample 07 | 461_27283 | 60  | EIN                | Atrophic endometrium                        | Benign |

**Table S1.** Details of patient used as the source of fallopian tube epithelial tissue sEV in the proteomics.

|         | Bovine      | Procine     | Feline      | Human       |
|---------|-------------|-------------|-------------|-------------|
| Bovine  | 1           | 0.068053993 | 0.108235294 | 0.198039216 |
| Porcine | 0.068053993 | 1           | 0.088515834 | 0.04386423  |
| Feline  | 0.108235294 | 0.088515834 | 1           | 0.084084084 |
| Human   | 0.198039216 | 0.04386423  | 0.084084084 | 1           |

**Table S2.** Jaccard similarity index of oviduct EV proteins detected in domestic, farm animals and human.

| SN | Gene ID | Protein name                                                      |
|----|---------|-------------------------------------------------------------------|
| 1  | CD59    | CD59 glycoprotein                                                 |
| 2  | CD81    | CD81 antigen                                                      |
| 3  | CD9     | CD9 antigen                                                       |
| 4  | CD47    | Leukocyte surface antigen CD47                                    |
| 5  | NT5E    | 5'-nucleotidase                                                   |
| 6  | ITGB1   | Integrin beta                                                     |
| 7  | HLA-DRA | HLA-DRA                                                           |
| 8  | LAMP2   | Lysosome-associated membrane glycoprotein 2                       |
| 9  | THY1    | Thy-1 antigen                                                     |
| 10 | CD44    | CD44 antigen                                                      |
| 11 | CD63    | CD63 antigen                                                      |
| 12 | HLA-A   | HLA class I histocompatibility antigen, alpha chain A             |
| 13 | SLC2A1  | Solute carrier family 2, facilitated glucose transporter member 1 |
| 14 | DPP4    | Dipeptidyl peptidase 4                                            |
| 15 | HLA-G   | HLA class I histocompatibility antigen, alpha chain G             |

**Table S3.** The list of 15 membrane proteins out of 61 common genes/proteins between hFTE transcriptome and hFTE sEV proteomics.
